# Supplementary material
Source: PubMed Central journal article supplement (PMC2786084)
Supplement: NIHMS157483-supplement-Supporting_Information.pdf [file NIHMS157483-supplement-Supporting_Information.pdf]

## **Electronic Supplementary Information belonging to the paper:**

### **Polycationic triazine-based dendrimers: Effect of peripheral groups on transfection efficiency**

**Meredith A. Mintzer,<sup>a,1</sup> Olivia M. Merkel,<sup>b,1</sup> Thomas Kissel,<sup>b</sup> and Eric E. Simanek<sup>a,\*</sup>**

<sup>a</sup> *Department of Chemistry, Texas A&M University, College Station, TX 77843-3255, USA. Fax: 979-845-9452; Tel: 979-845-4242; E-mail: [simanek@mail.chem.tamu.edu](mailto:simanek@mail.chem.tamu.edu)*

<sup>b</sup> *Department of Pharmaceutics and Biopharmacy, Philipps-Universität Marburg, Ketzerbach 63, D-35032 Marburg, Germany. Fax: +49-6421-282 7016; Tel: +49-6421-282 5881; E-mail: [kissel@staff.uni-marburg.de](mailto:kissel@staff.uni-marburg.de)*

<sup>1</sup> *Both authors contributed equally to this work with synthesis (MAM) and biological and physico-chemical characterization (OMM)*

## <sup>1</sup>H NMR Spectrum Monochlorotriazine 1

MAM48-H1

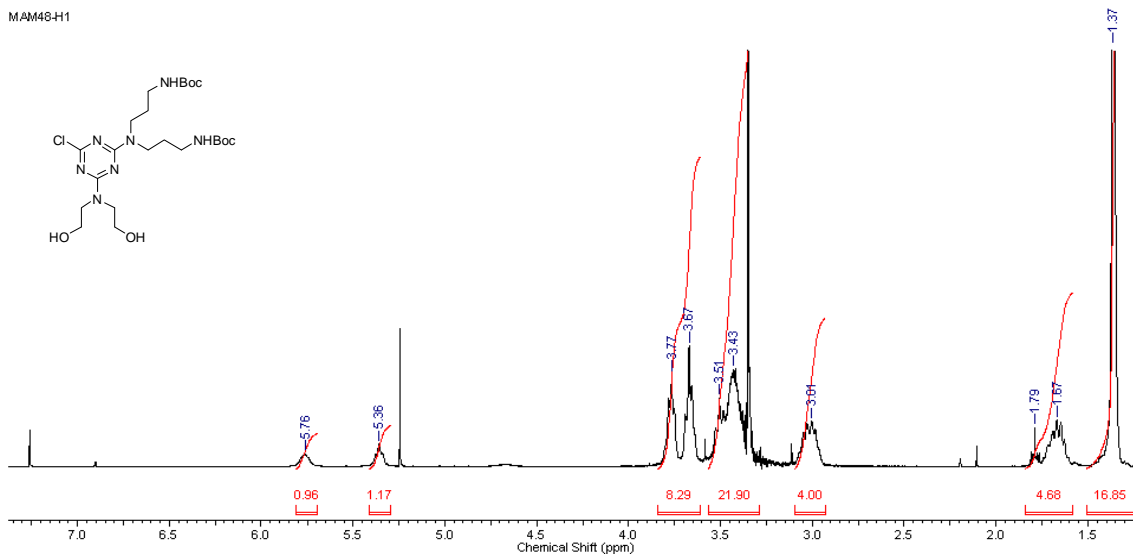

## <sup>13</sup>C NMR Spectrum Monochlorotriazine 1

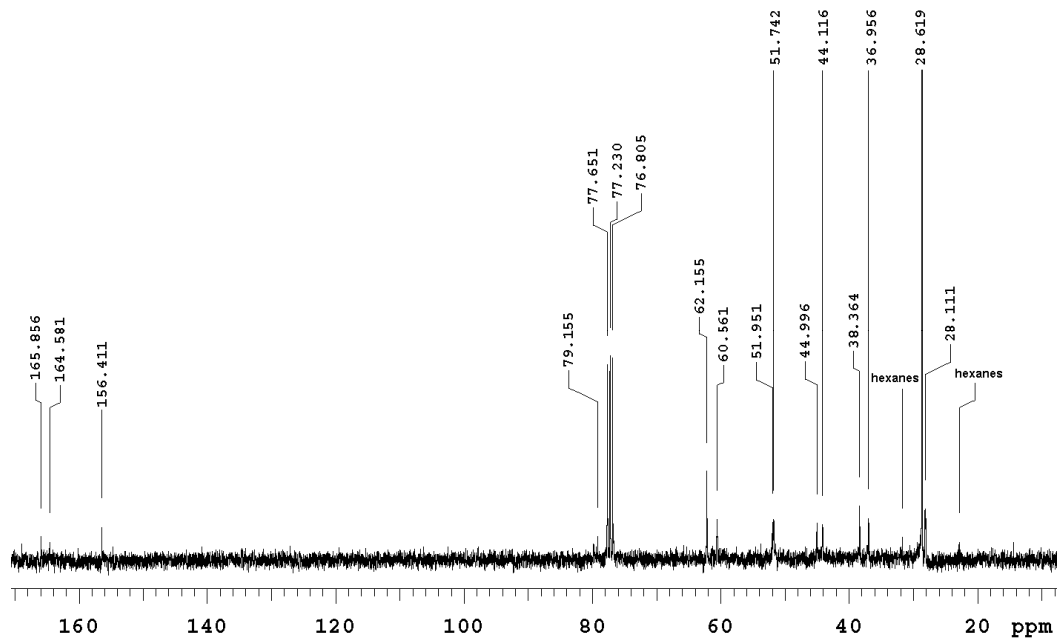

## Mass Spectrum Monochlorotriazine 1

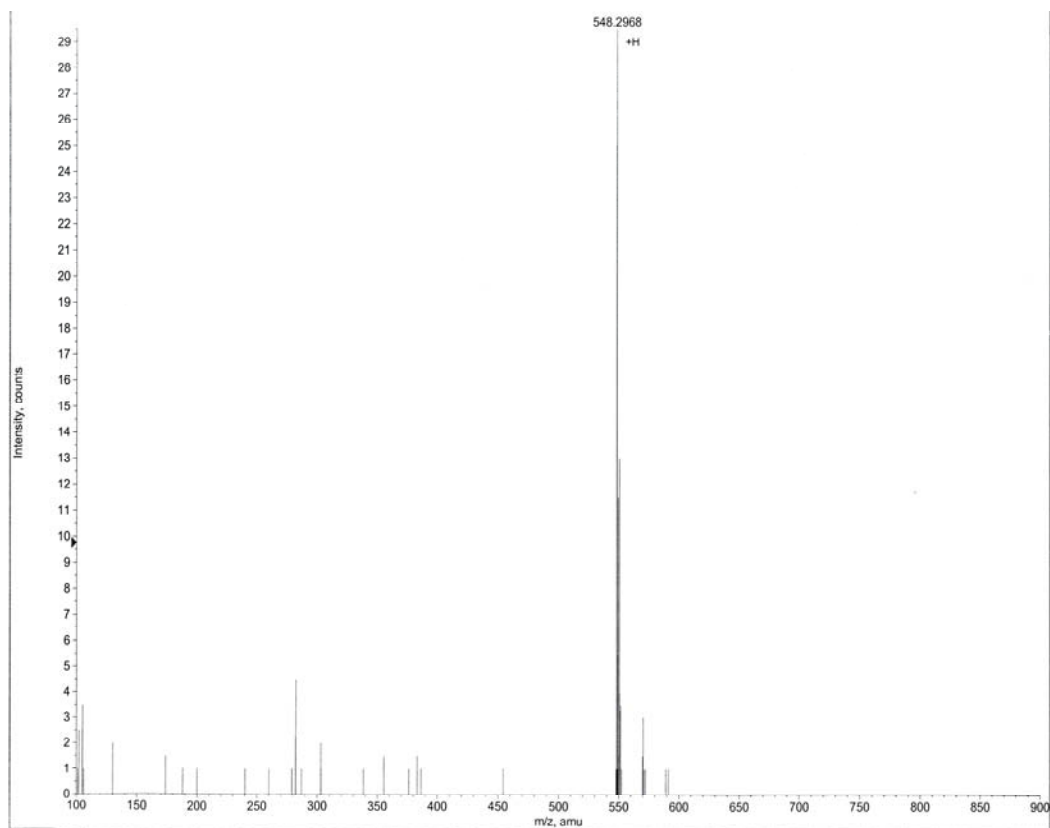

## <sup>1</sup>H NMR Spectrum Monochlorotriazine 3

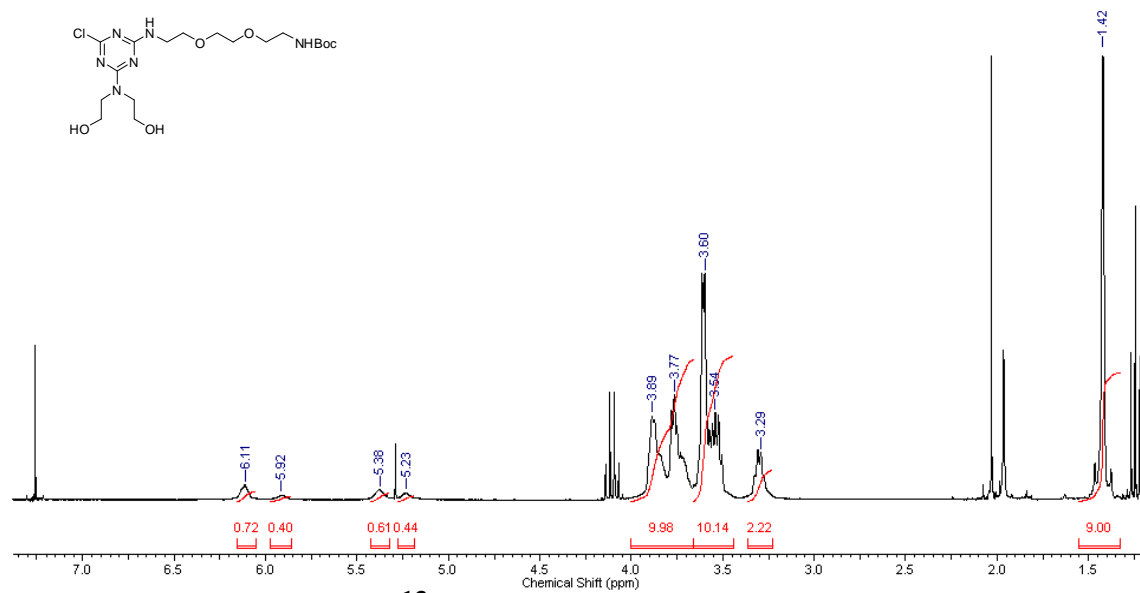

## <sup>13</sup>C NMR Spectrum Monochlorotriazine 3

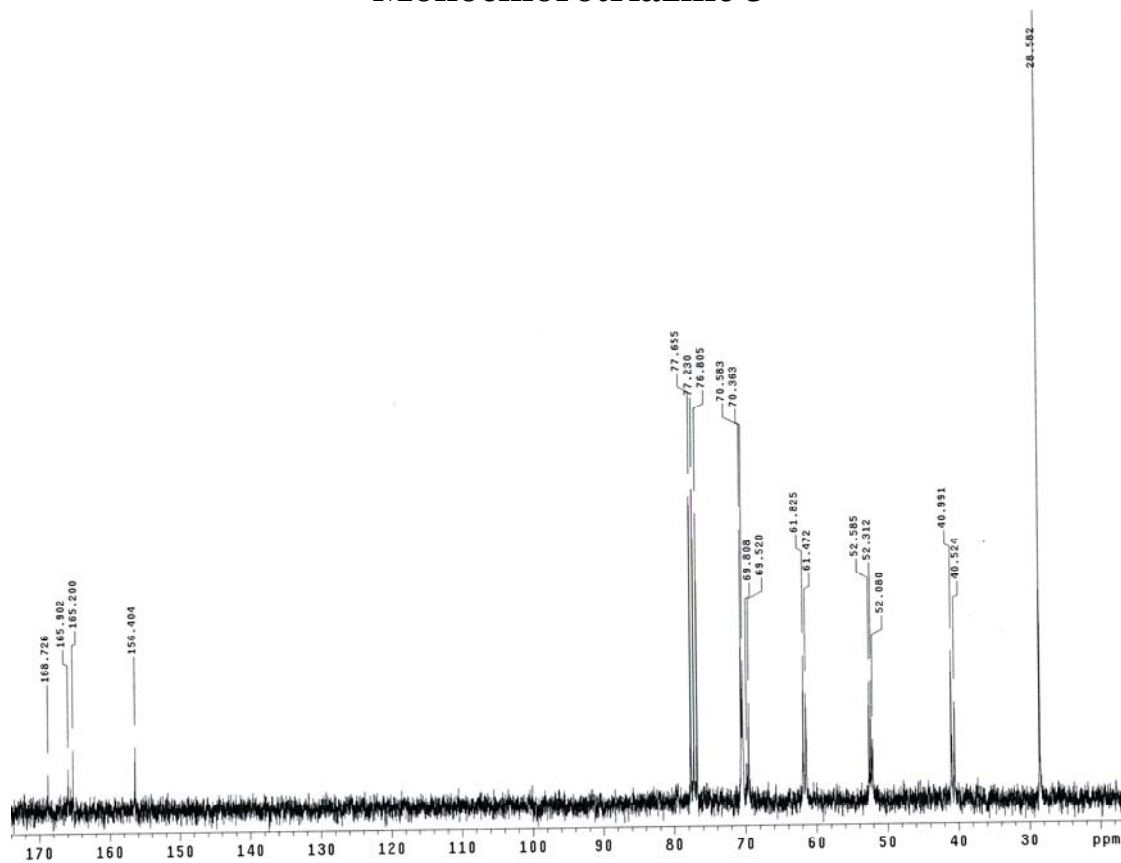

## Mass Spectrum Monochlorotriazine 3

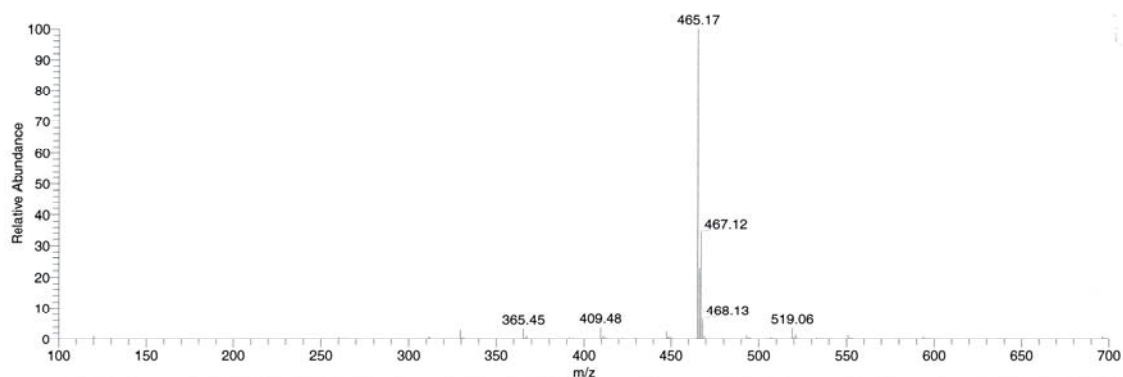

01040717 #27 RT: 0.33 AV: 1 NL: 2.71E9  
T: + c Full ms [ 100.00-700.00]

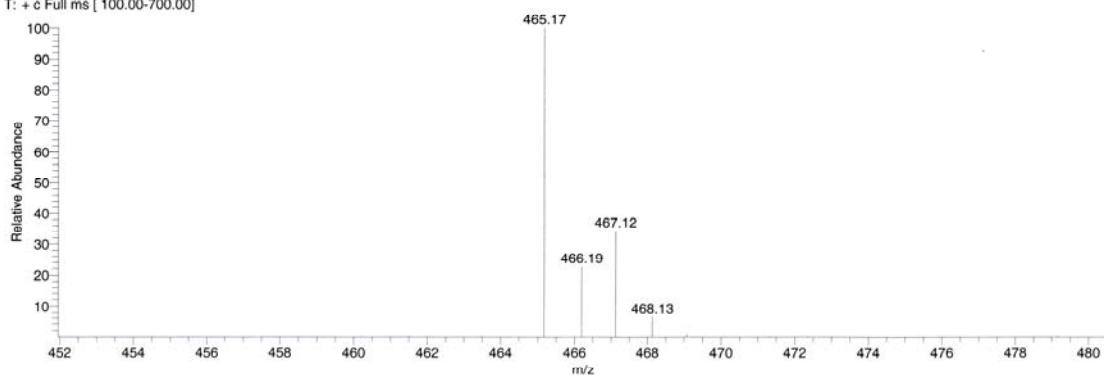

## <sup>1</sup>H NMR Spectrum Monochlorotriazine 4

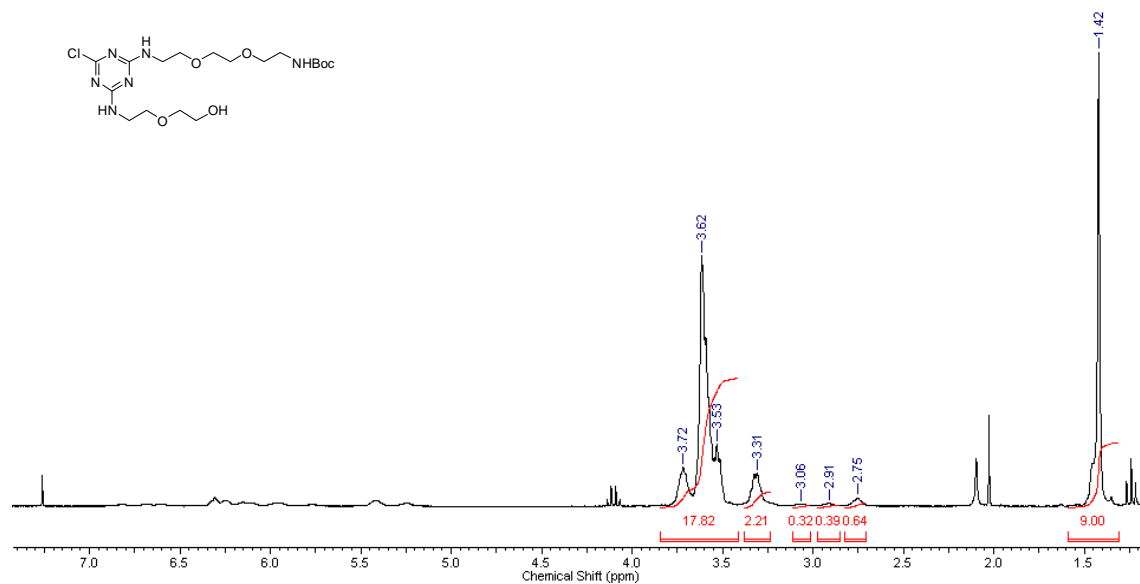

## <sup>13</sup>C NMR Spectrum Monochlorotriazine 4

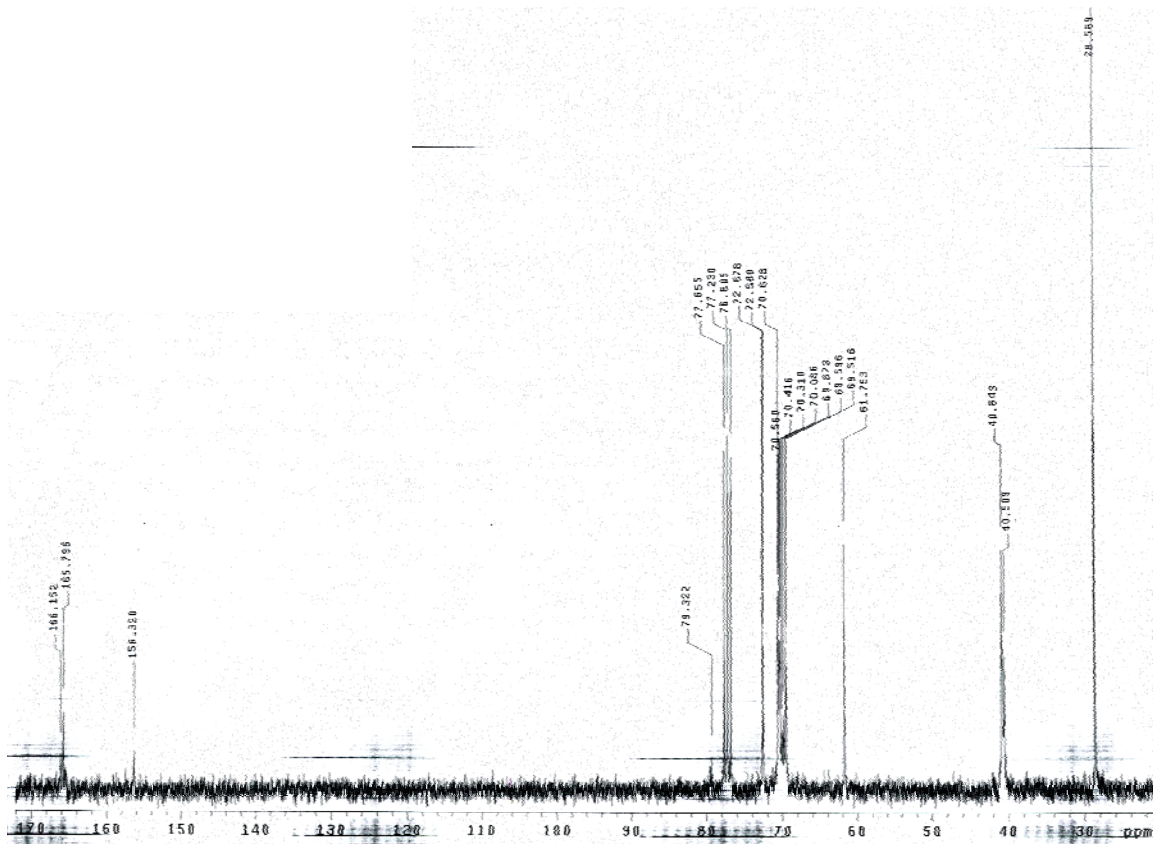

## Mass Spectrum Monochlorotriazine 4

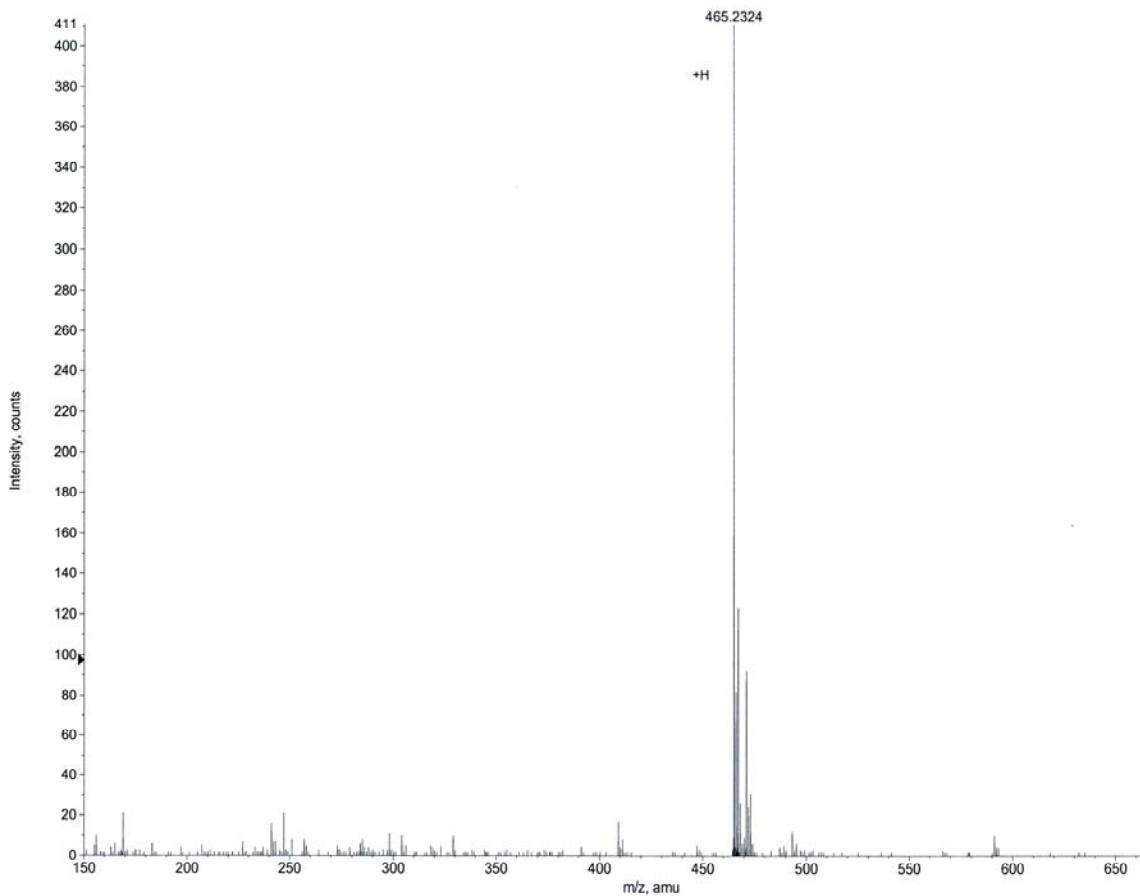

## <sup>1</sup>H NMR Spectrum Monochlorotriazine 5

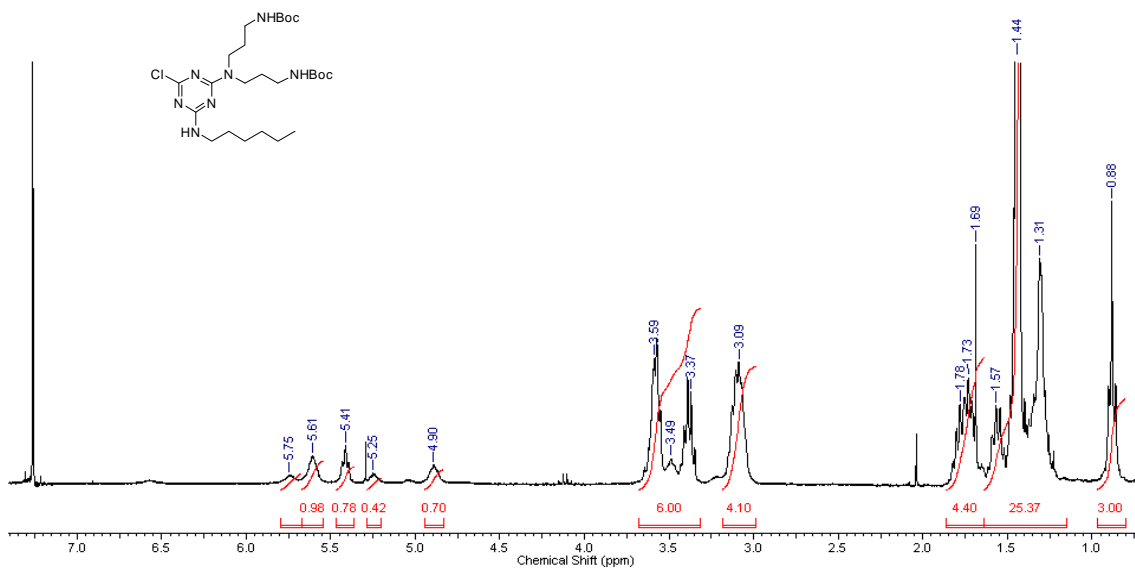

## <sup>13</sup>C NMR Spectrum Monochlorotriazine 5

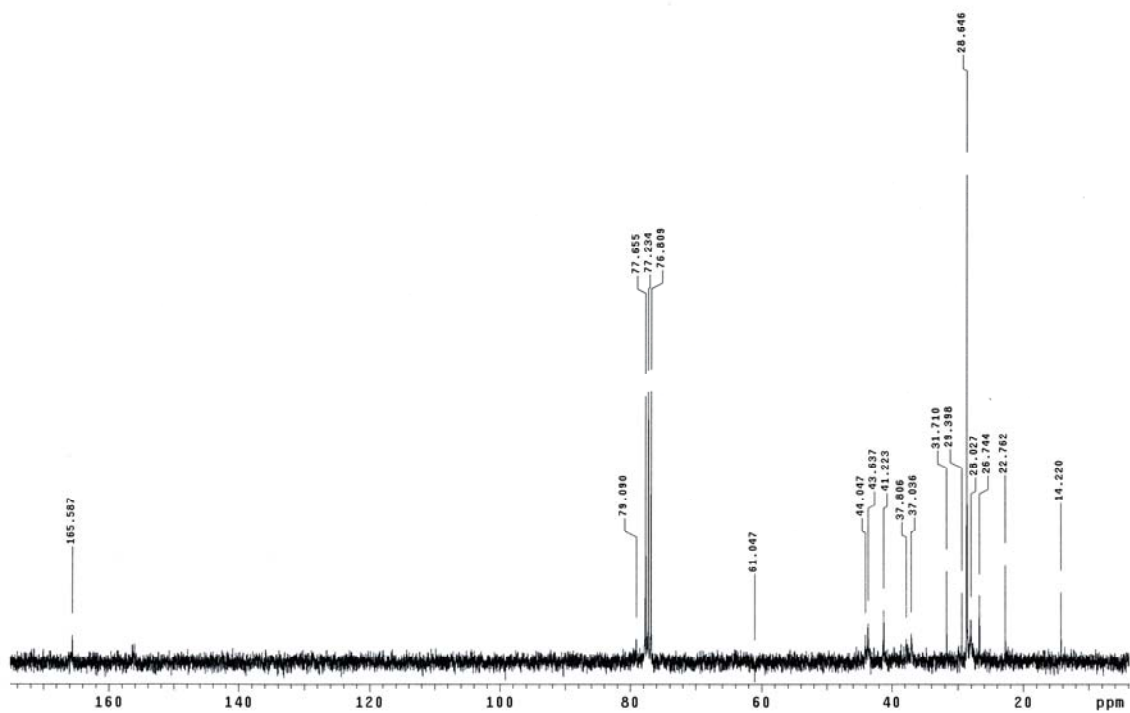



## Mass Spectrum Monochlorotriazine 5

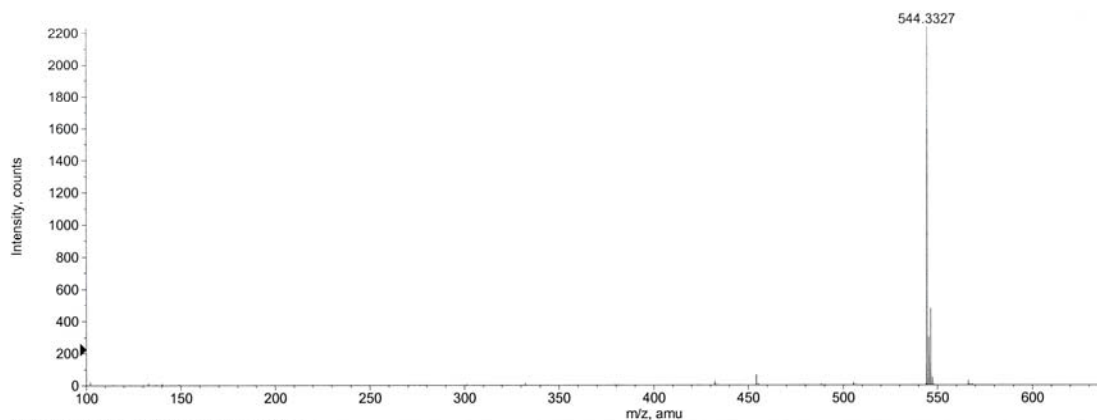

+TOF MS: 0.833 to 0.933 min from 04160704.wiff  
a=3.55533986961586570e-004, 10=4.56561119829857490e+001

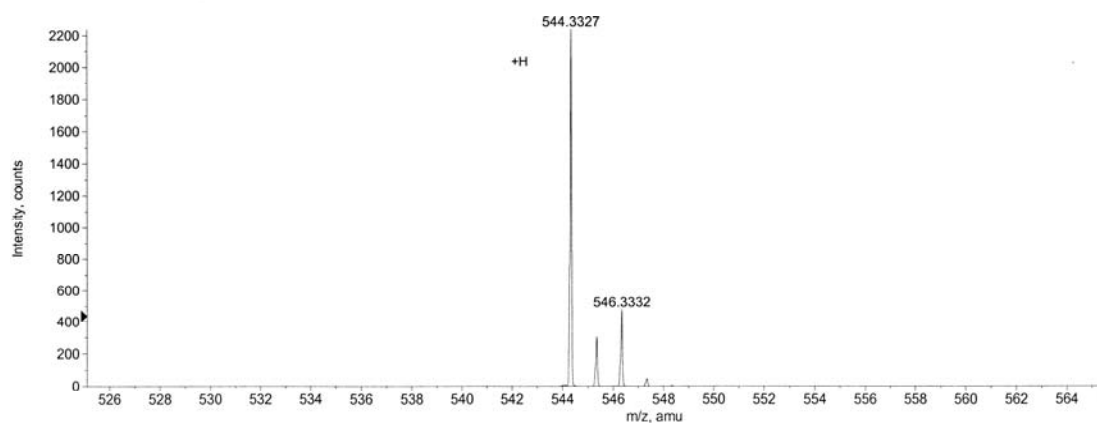

## $^1\text{H}$ NMR Spectrum Protected G2-1 Dendrimer

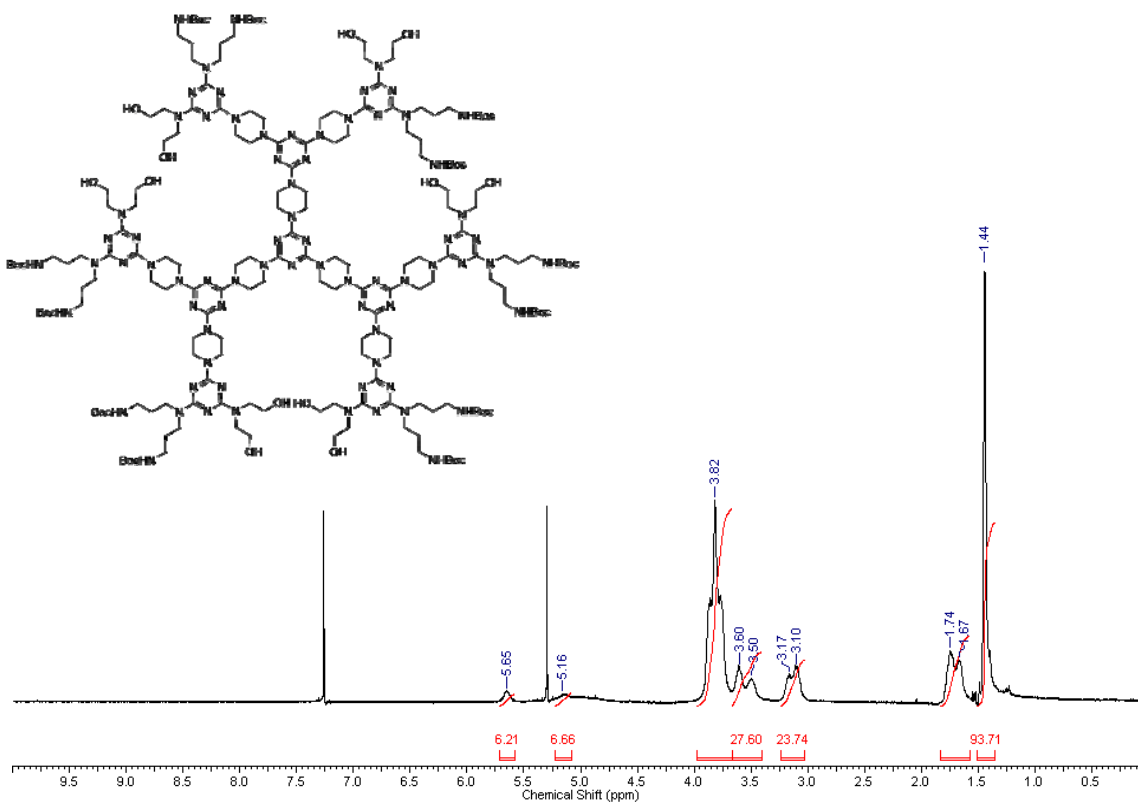

## $^{13}\text{C}$ NMR Spectrum Protected G2-1 Dendrimer

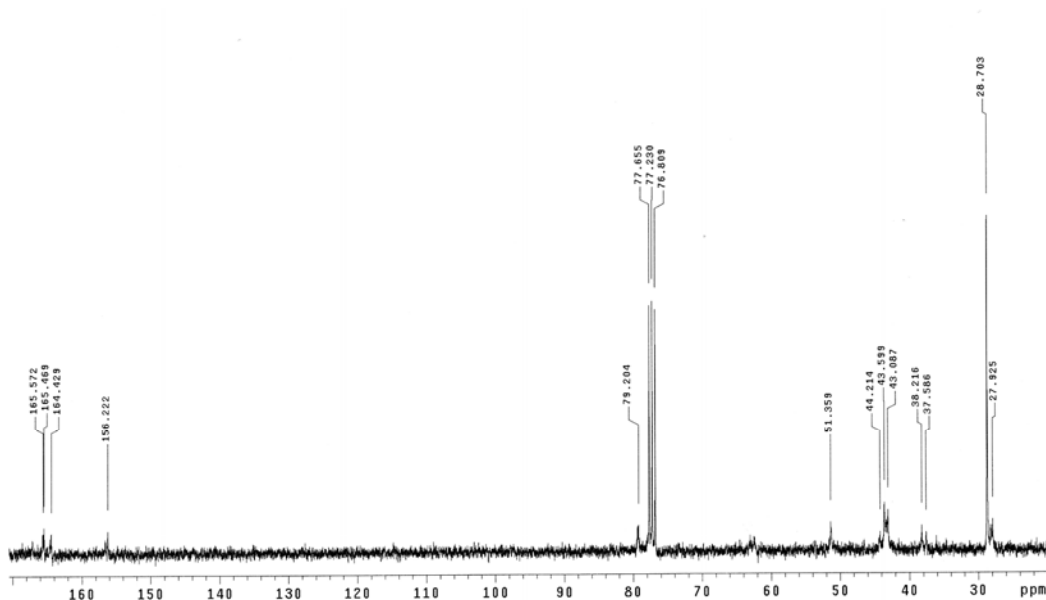

## Mass Spectrum Protected G2-1 Dendrimer

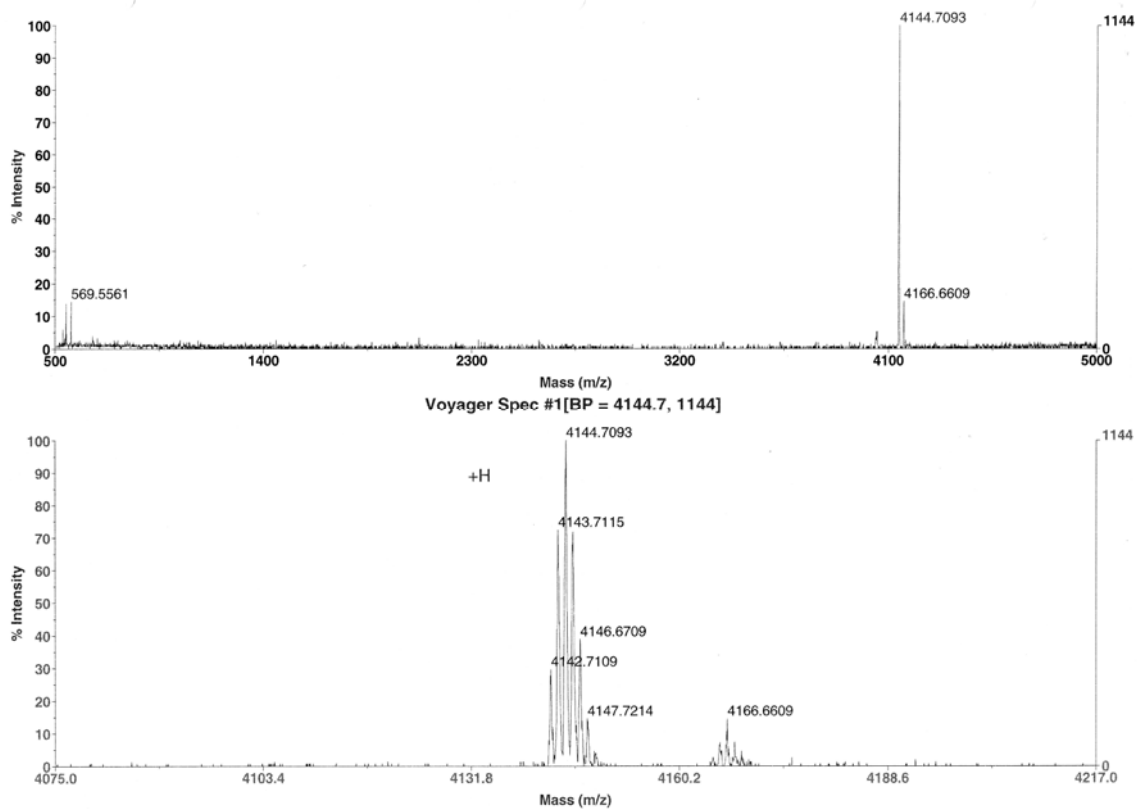

Additional peak seen at 4043.92 corresponds to the loss of one Boc group.

## Mass Spectrum G2-1 Dendrimer

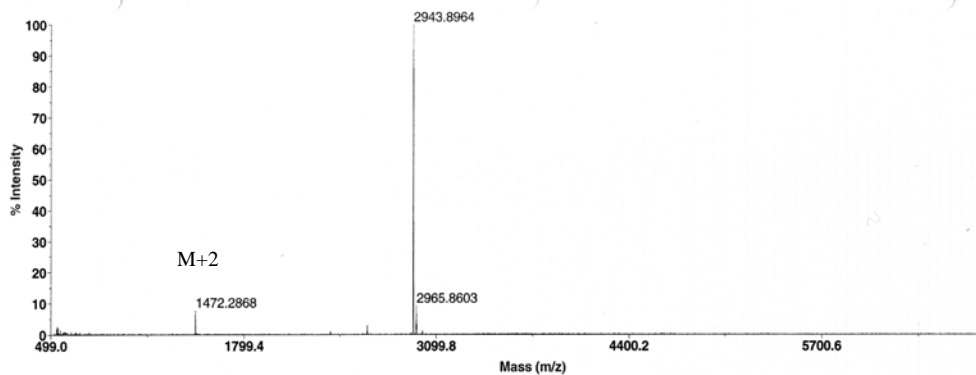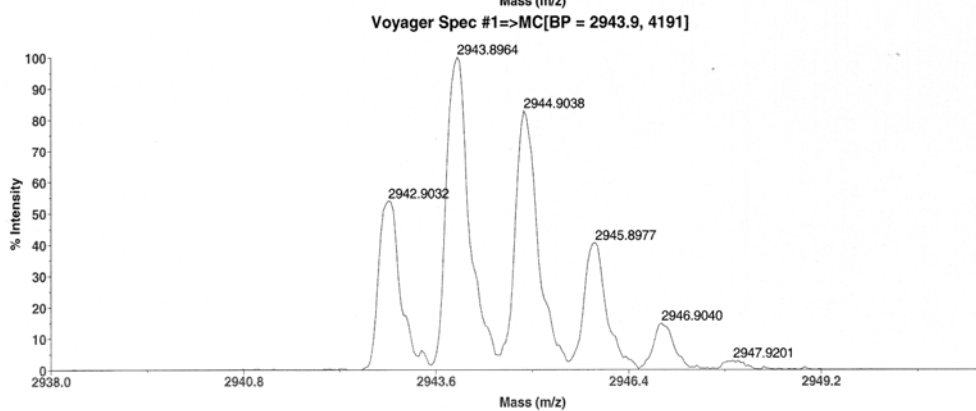

## HPLC G2-1 Dendrimer

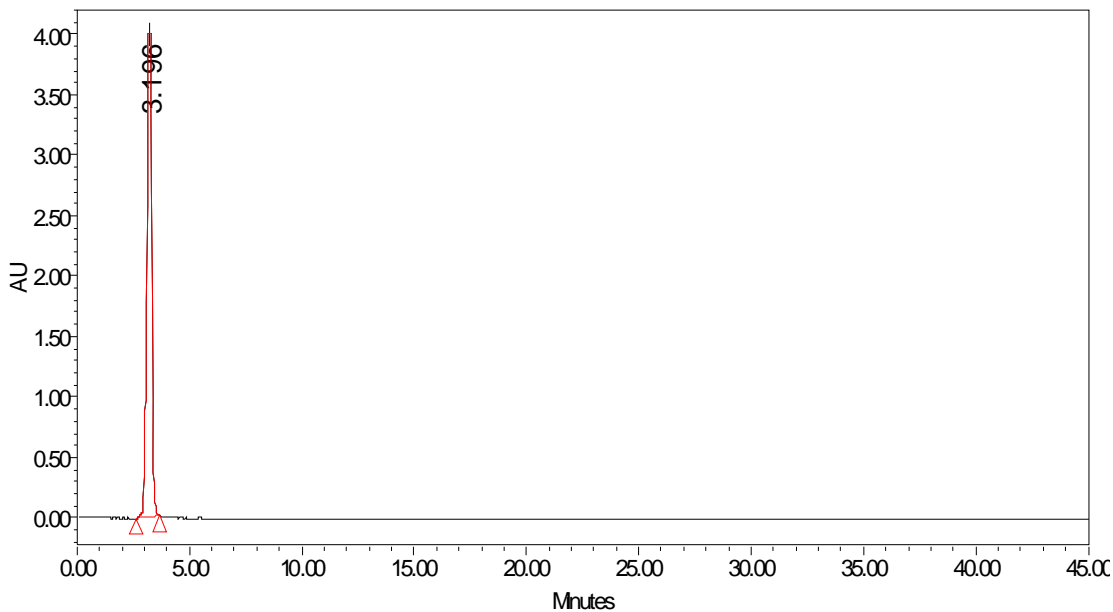

## Mass Spectrum G2-1g Dendrimer

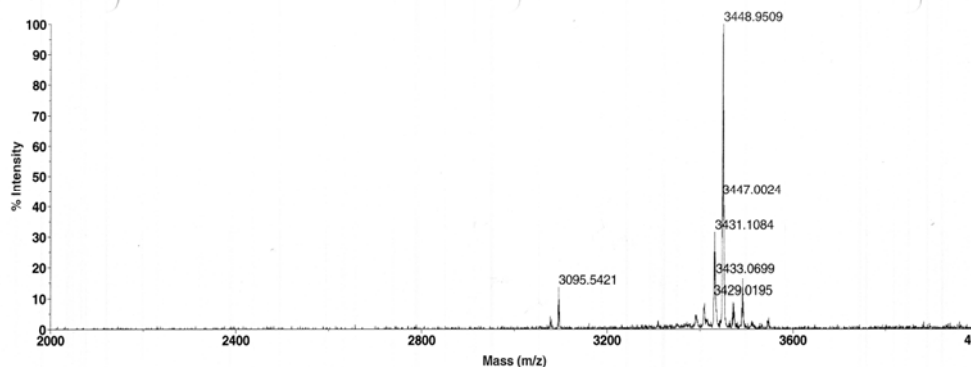

Voyager Spec #1[BP = 3449.0, 4254]

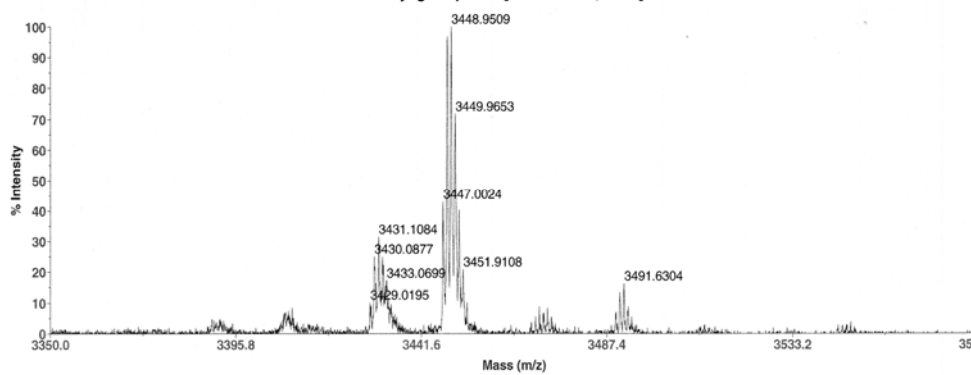

### ADDITIONAL PEAKS

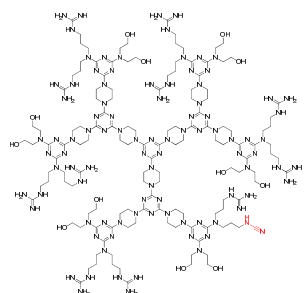

3429.18 → loss of ammonia

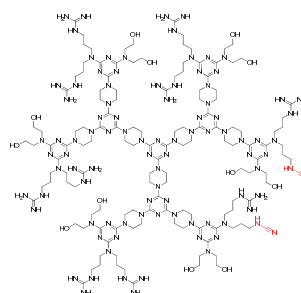

3412.15 → loss of two ammonia

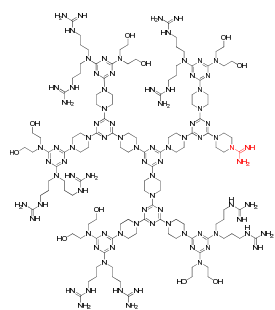

3092.98 → guanidinylation of piperazine

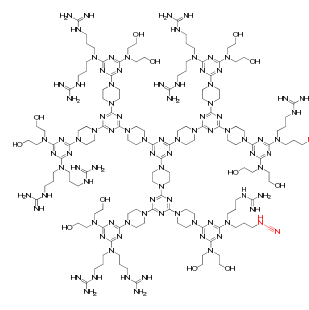

3387.16 → loss of ammonia and carbodiimide

## <sup>1</sup>H NMR Spectrum Protected G2-2 Dendrimer

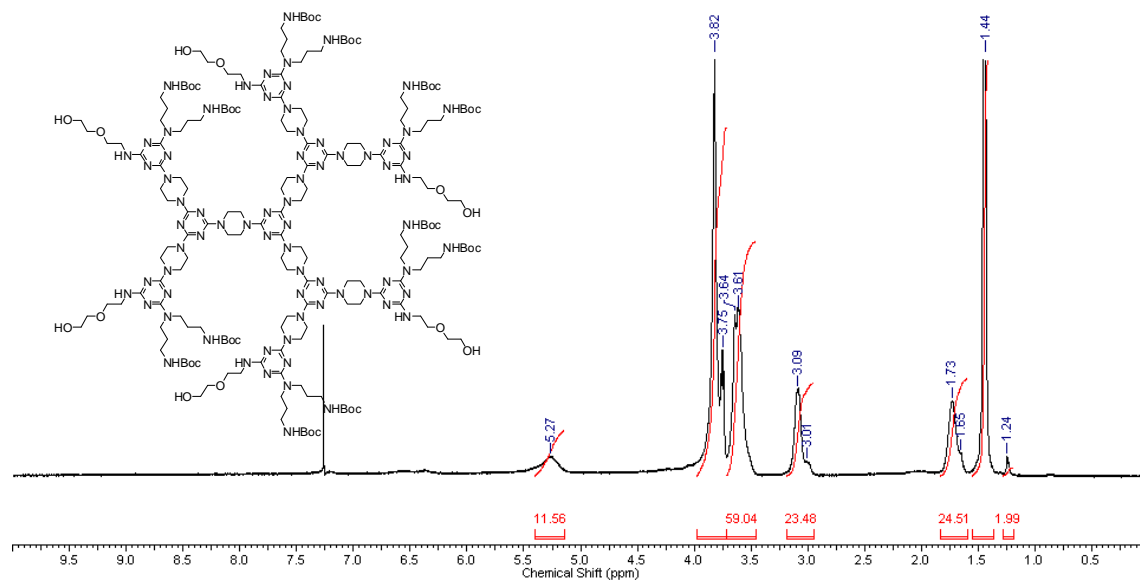

## <sup>13</sup>C NMR Spectrum Protected G2-2 Dendrimer

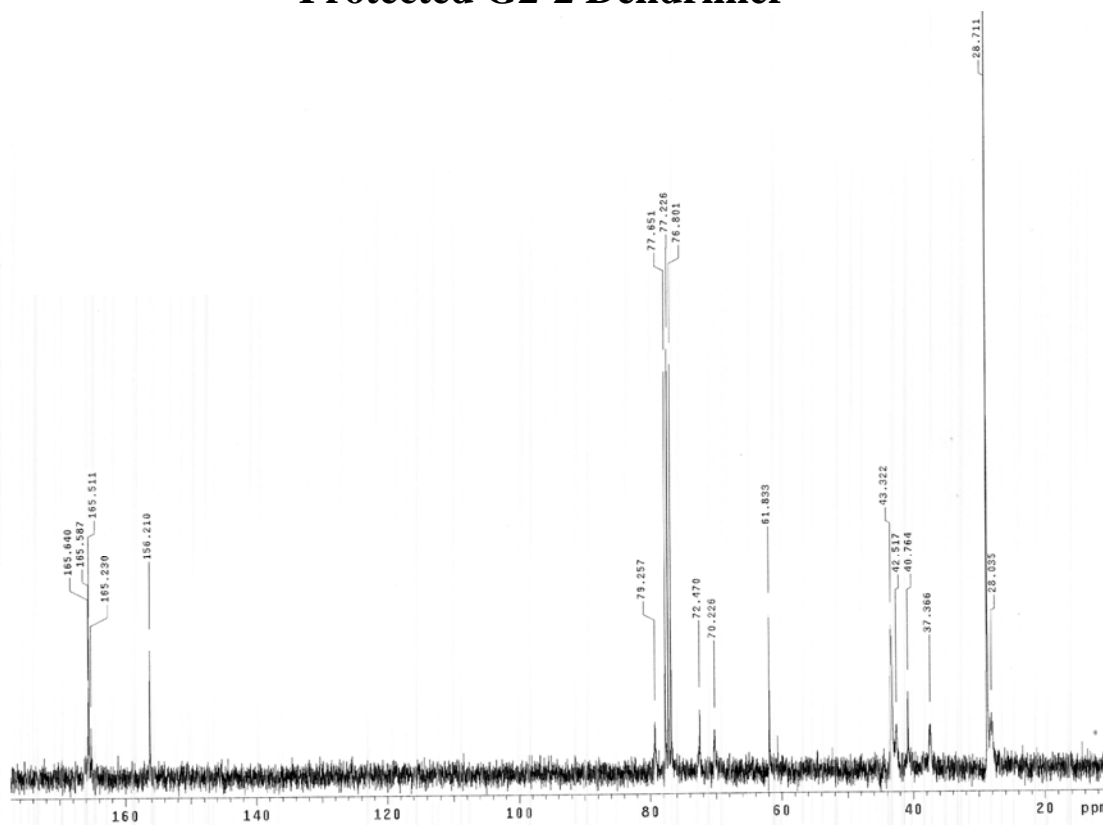

## Mass Spectrum Protected G2-2 Dendrimer

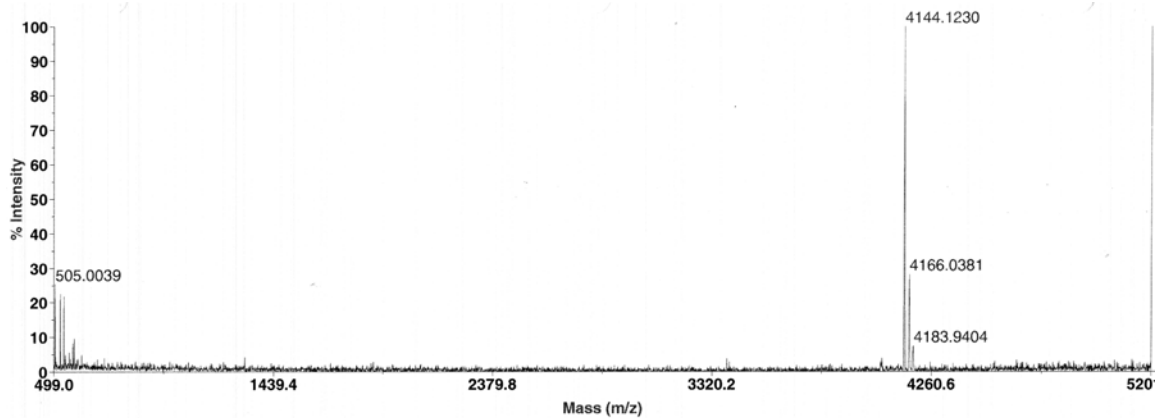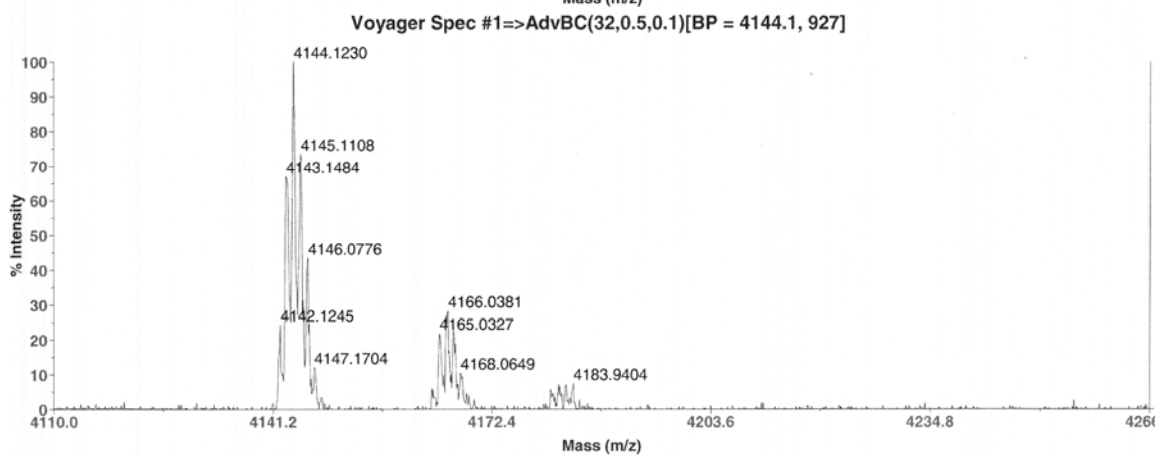

## Mass Spectrum G2-2 Dendrimer

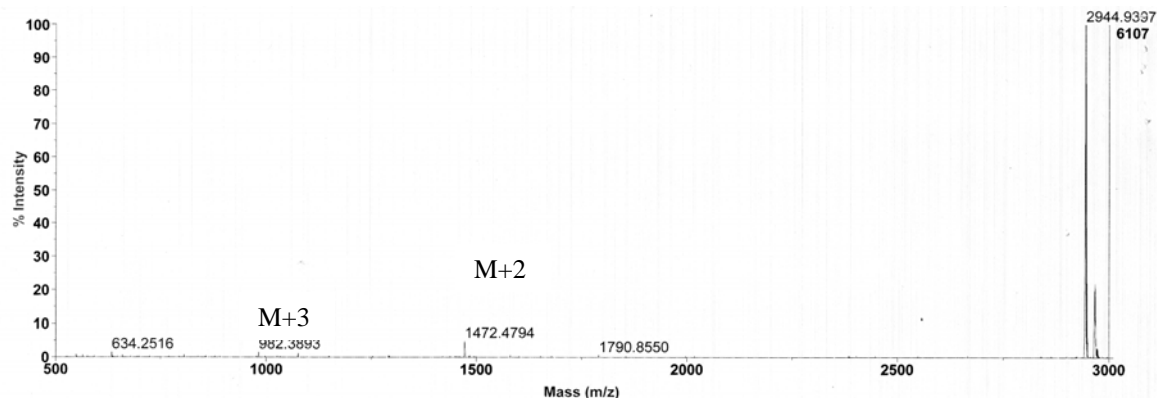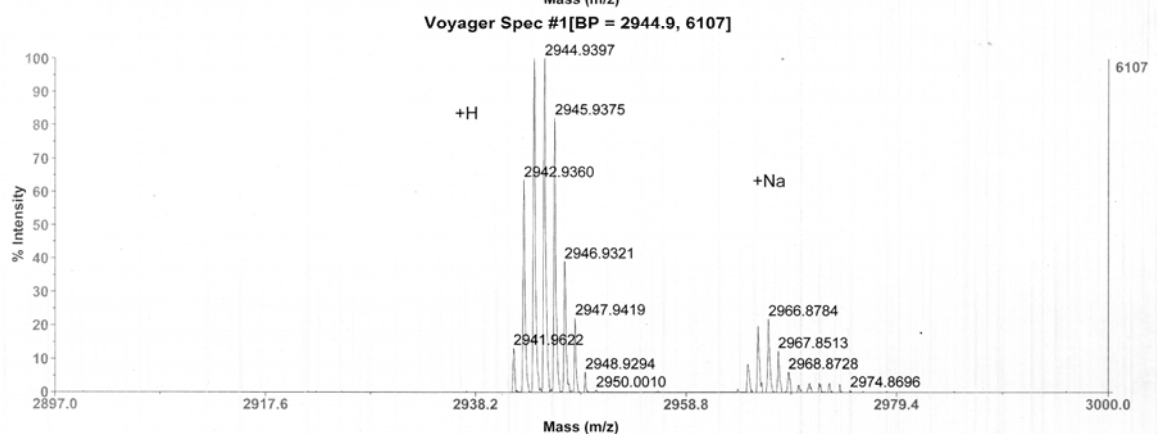

## HPLC

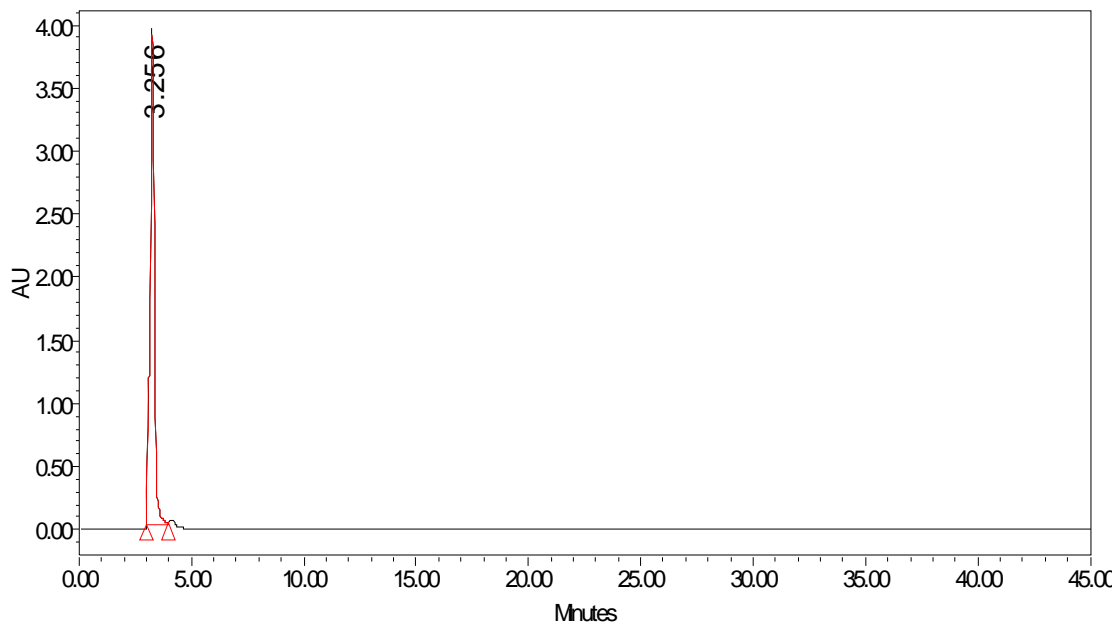



## Mass Spectrum G2-2g Dendrimer

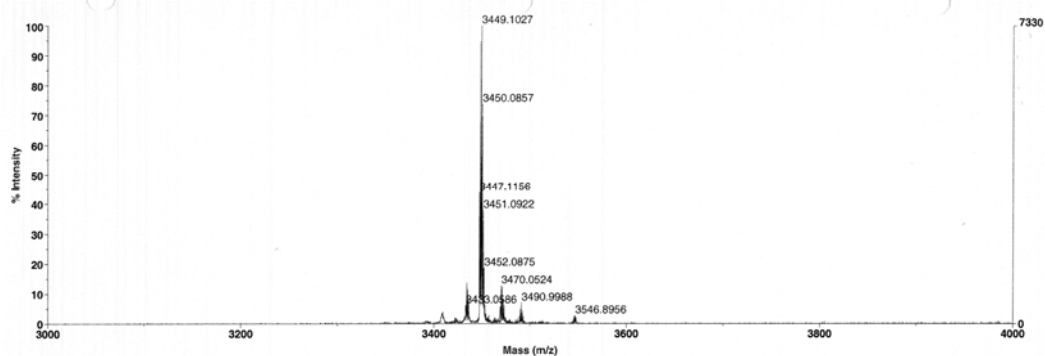

Voyager Spec #1[BP = 3449.1, 7330]

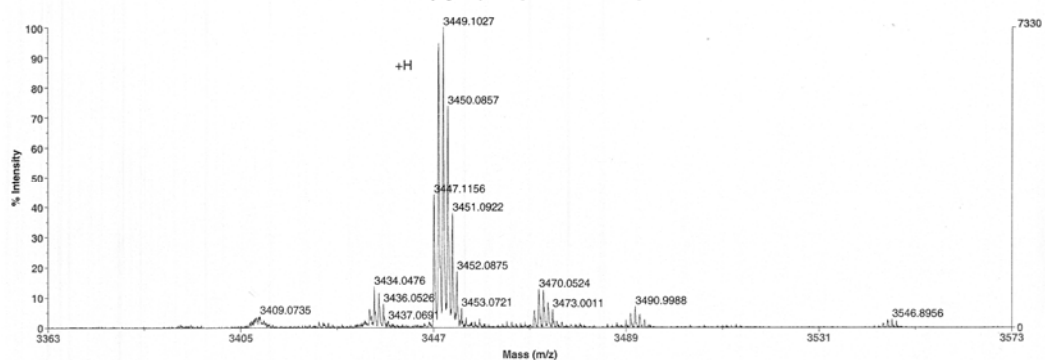

### ADDITIONAL PEAKS

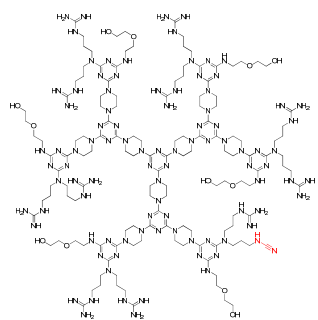

3429.18 → loss of ammonia

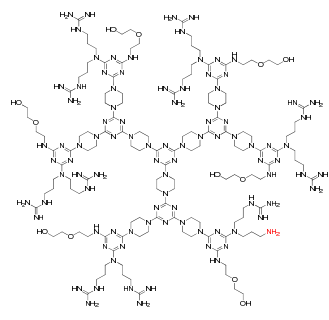

3404.18 → loss of carbodiimide

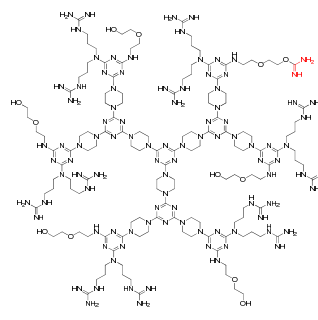

3488.23 → alcohol reacted

## <sup>1</sup>H NMR Spectrum Protected G2-3 Dendrimer

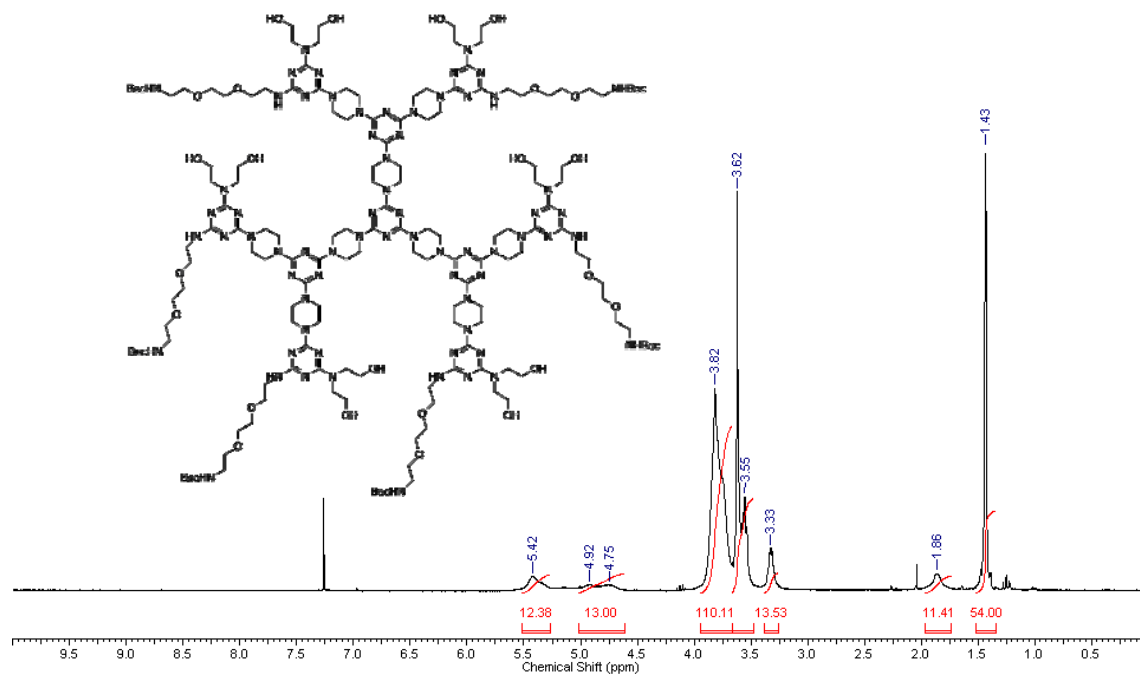

## <sup>13</sup>C NMR Spectrum Protected G2-3 Dendrimer

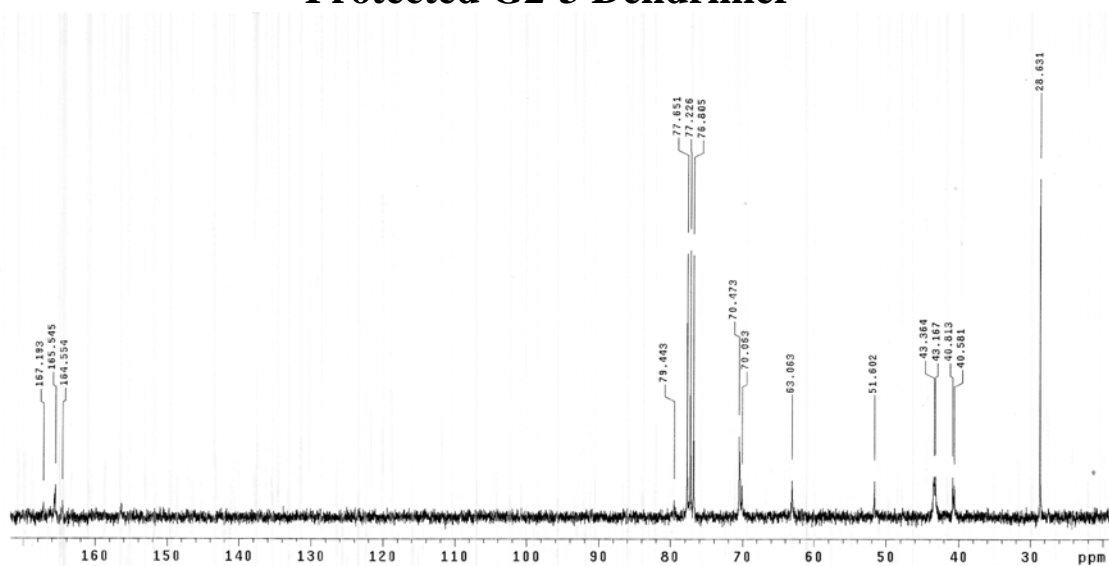

## Mass Spectrum Protected G2-3 Dendrimer

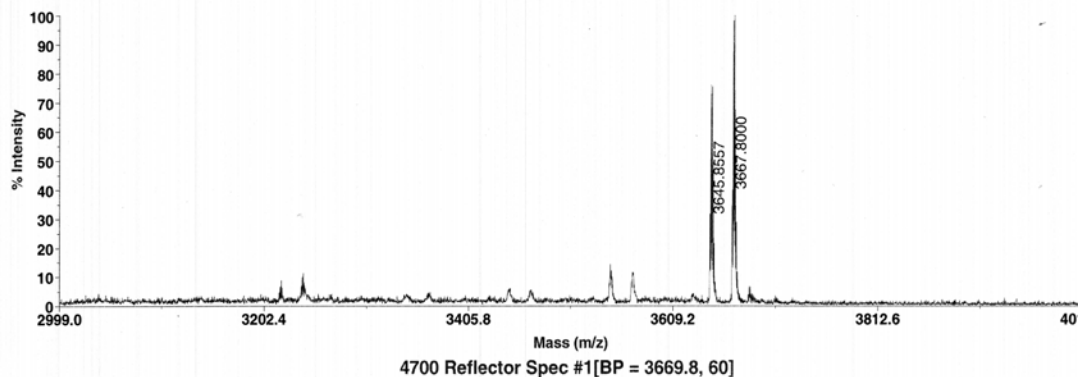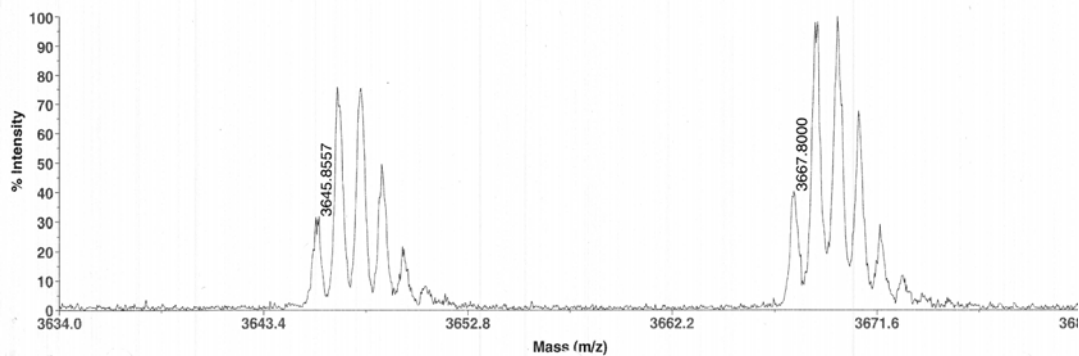

| COMPOUND                                                                            | EXACT MASS |
|-------------------------------------------------------------------------------------|------------|
| Loss of one Boc group                                                               | 3544.08    |
| Loss of two Boc groups                                                              | 3444.03    |
| Loss of three Boc groups                                                            | 3343.98    |
| 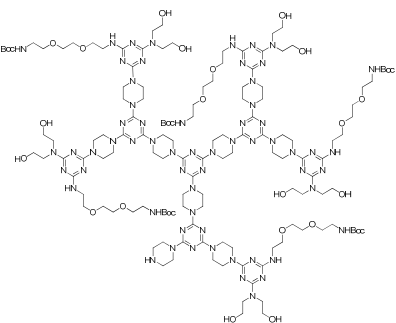 | 3215.89    |

## Mass Spectrum G2-3 Dendrimer

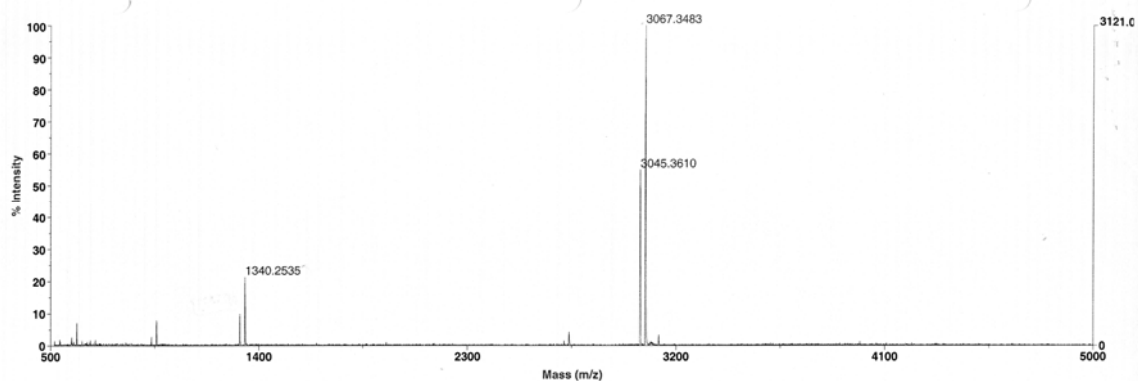

Voyager Spec #1[BP = 3067.3, 3121]

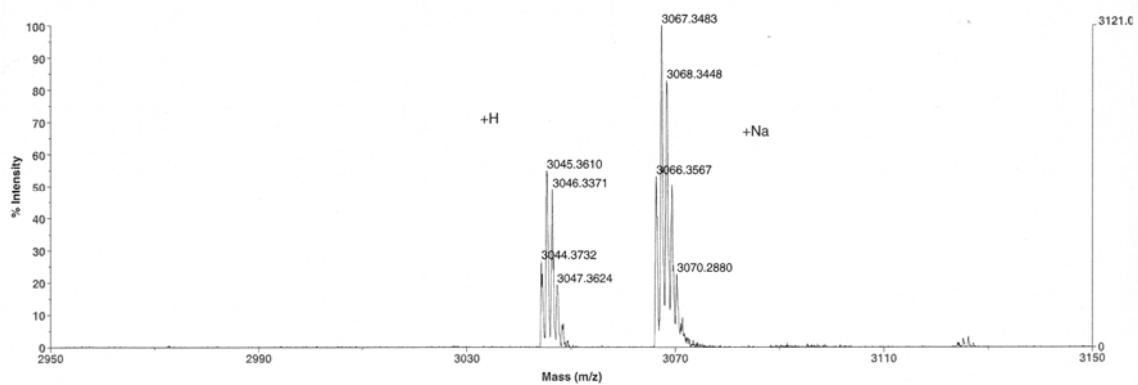

## HPLC

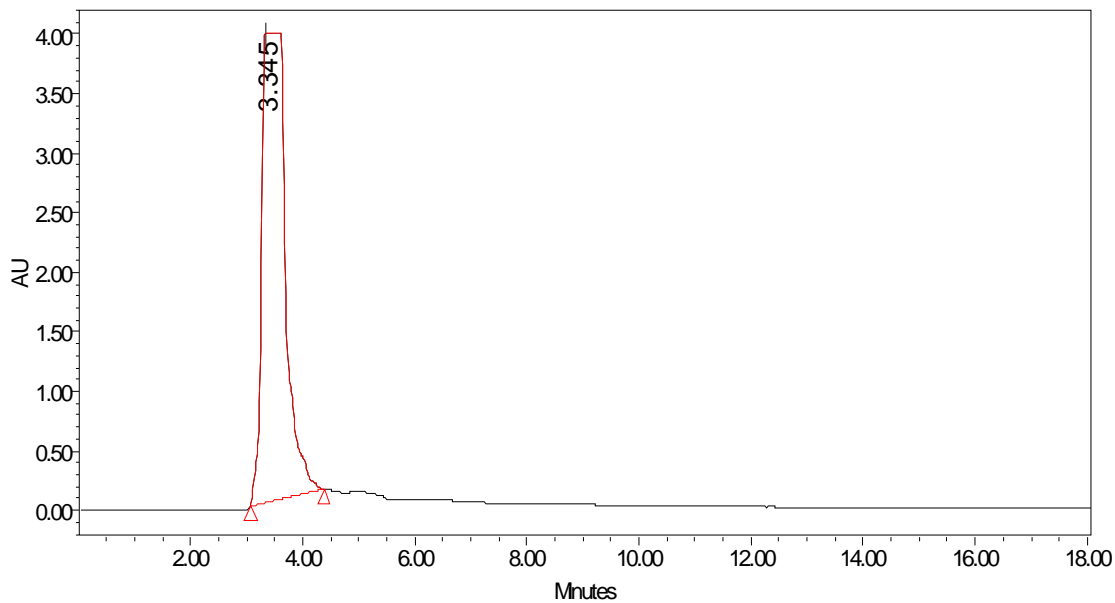

## Mass Spectrum G2-3g Dendrimer

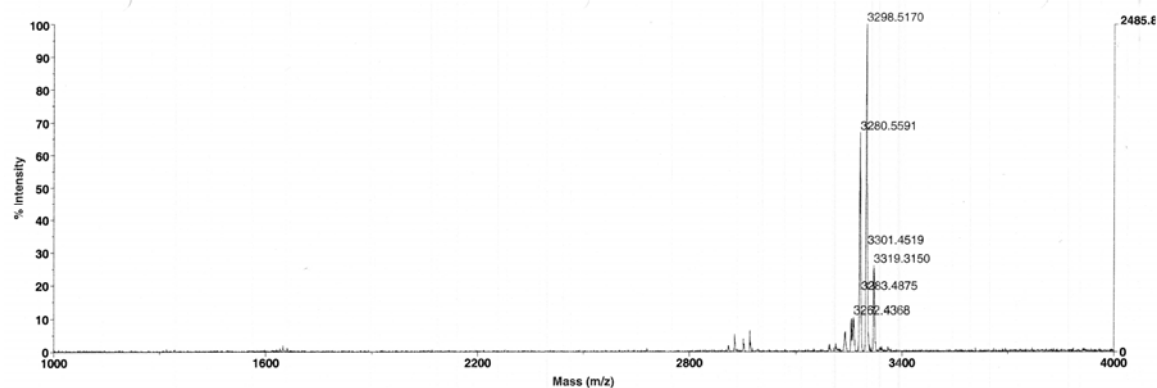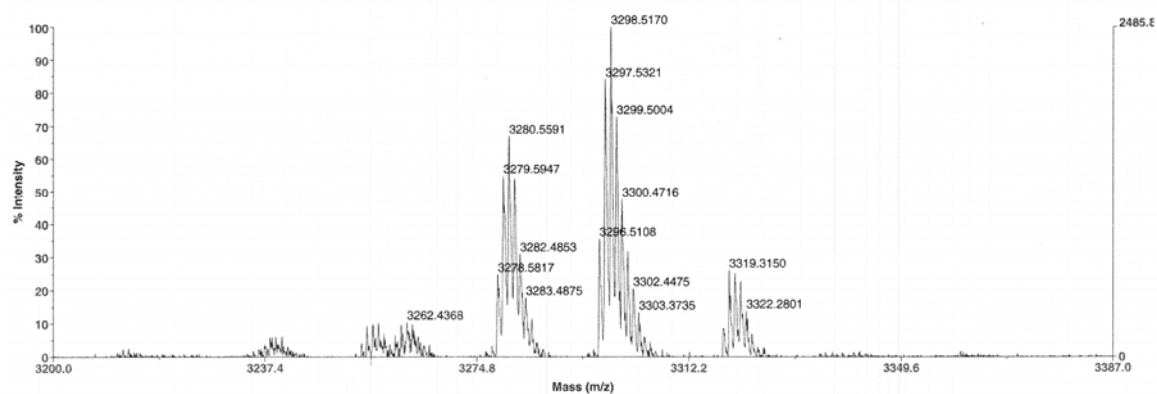

### ADDITIONAL PEAKS

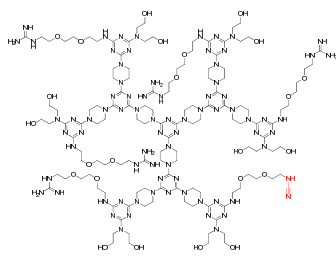

3278.92 → loss of ammonia

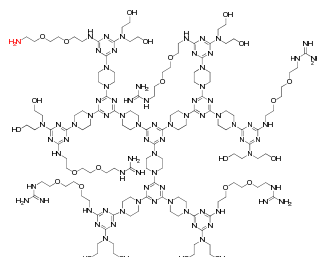

3253.93 → loss of carbodiimide

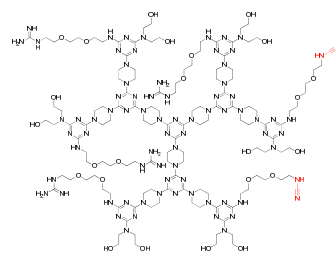

3261.90 → loss of two ammonia

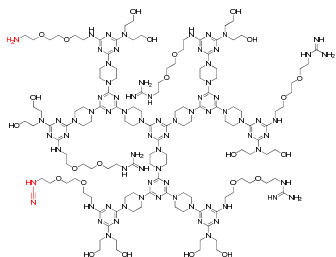

3236.90 → loss of ammonia and carbodiimide

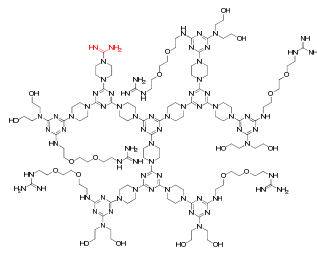

2967.76 → guanidylated piperazine

## <sup>1</sup>H NMR Spectrum Protected G2-4 Dendrimer

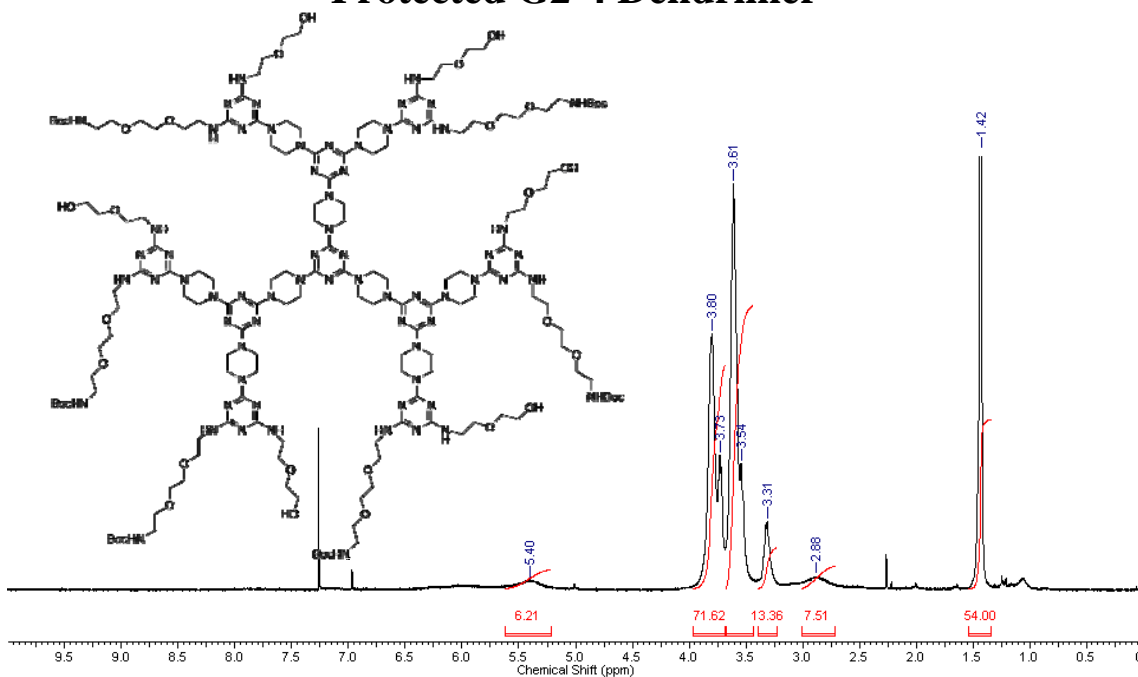

## <sup>13</sup>C NMR Spectrum Protected G2-4 Dendrimer

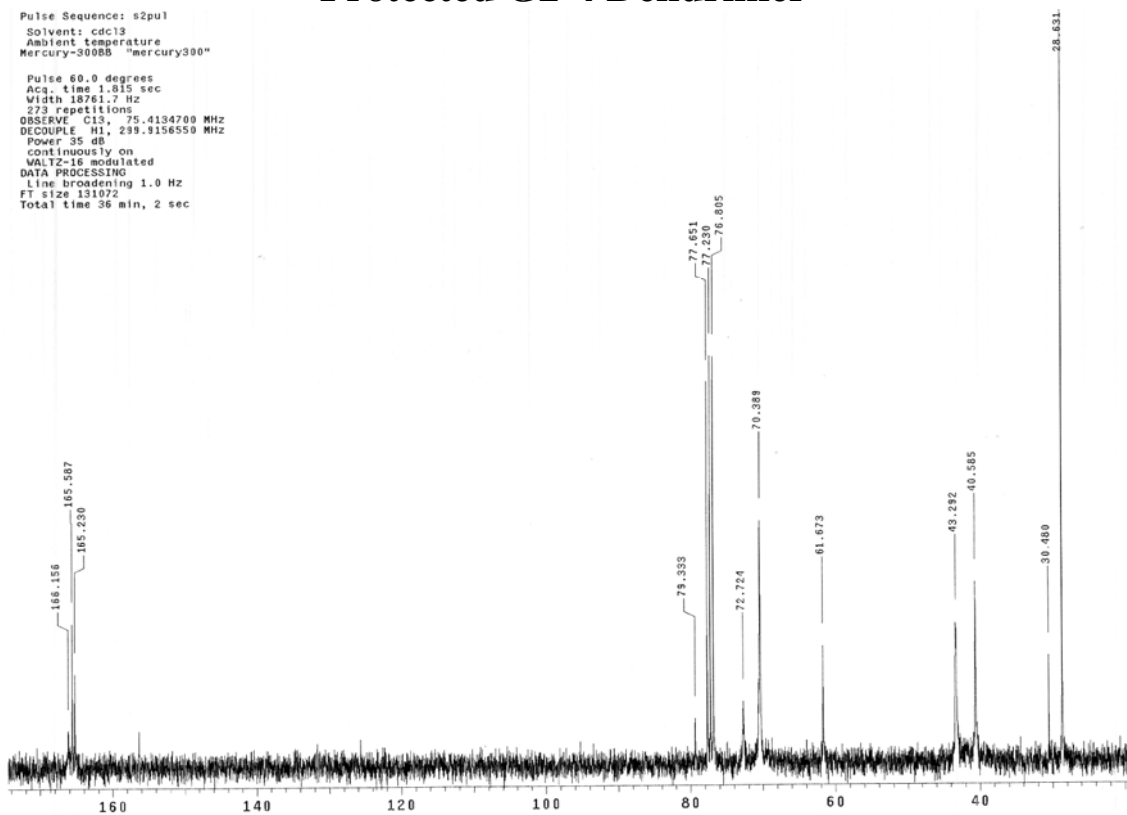

## Mass Spectrum Protected G2-4 Dendrimer

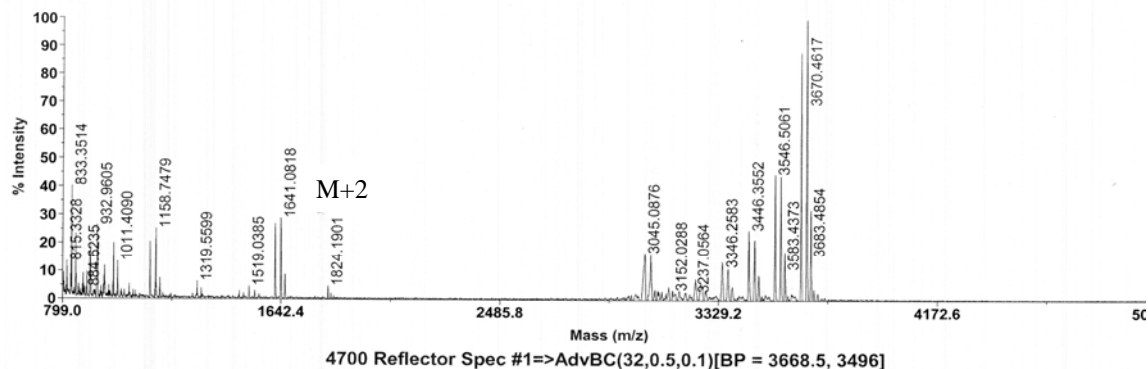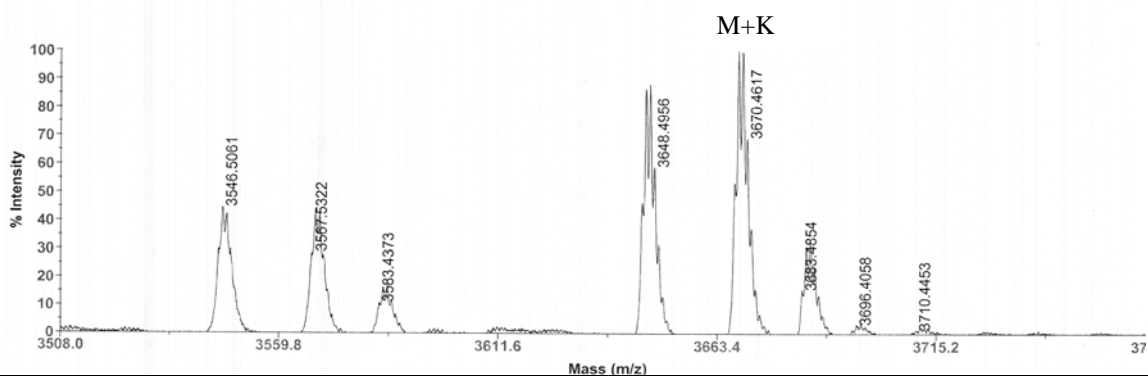

| ADDITIONAL PEAKS                               |                                                |                                                 |
|------------------------------------------------|------------------------------------------------|-------------------------------------------------|
| Loss off one Boc group<br>Exact Mass: 3544.08  | Loss of two Boc groups<br>Exact Mass: 3444.03  | Loss of three Boc groups<br>Exact Mass: 3343.98 |
| Loss of four Boc groups<br>Exact Mass: 3243.92 | Loss of five Boc groups<br>Exact Mass: 3143.87 | Loss of six Boc groups<br>Exact Mass: 3043.82   |

## Mass Spectrum G2-4 Dendrimer

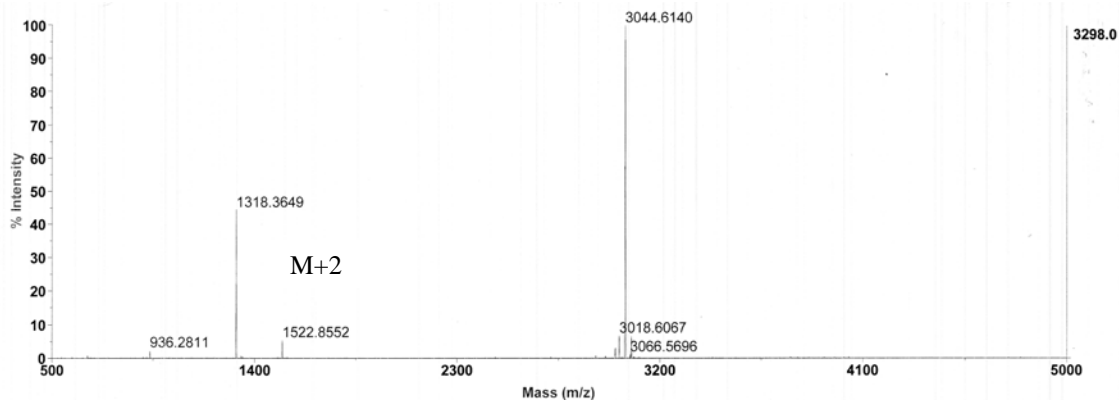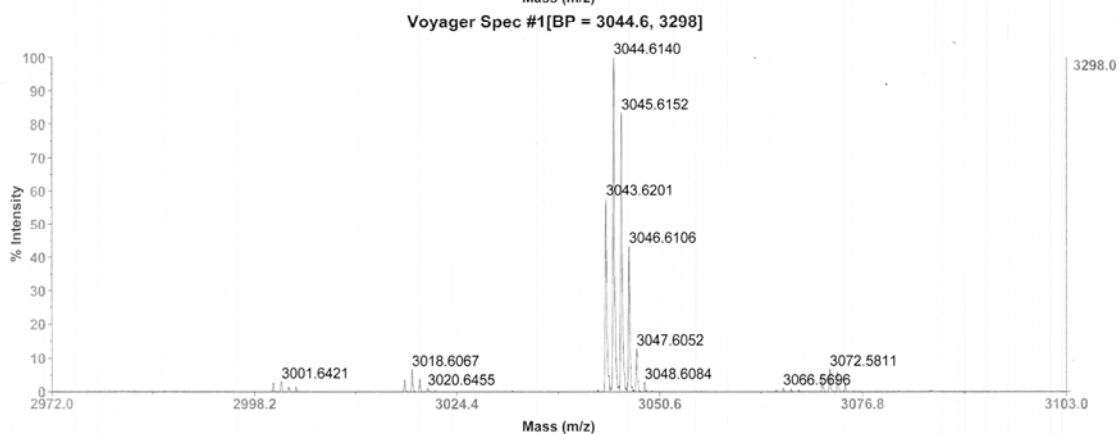

## HPLC

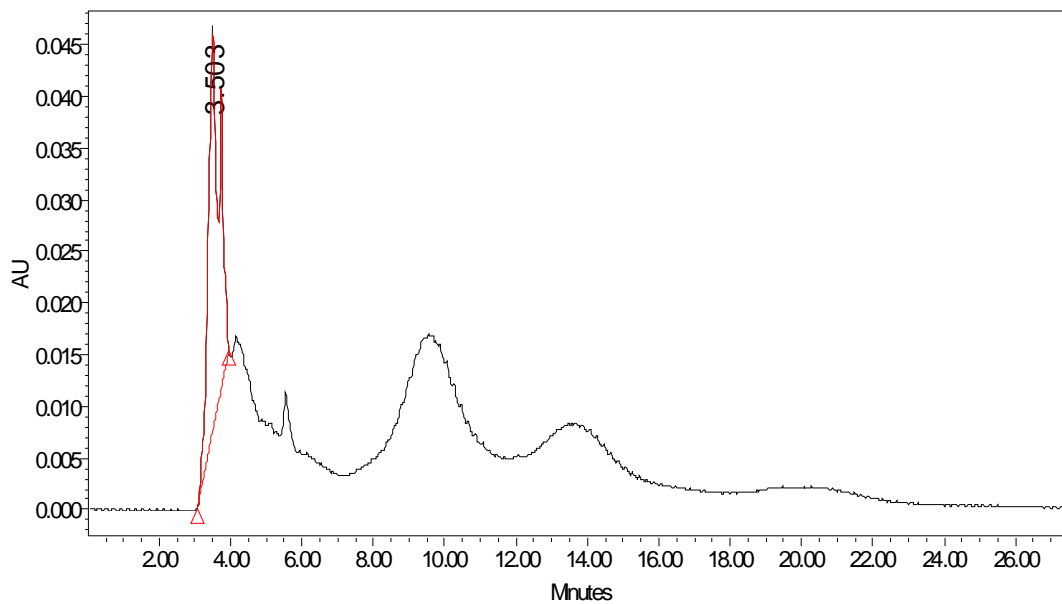



## <sup>1</sup>H NMR Spectrum Protected G2-5 Dendrimer

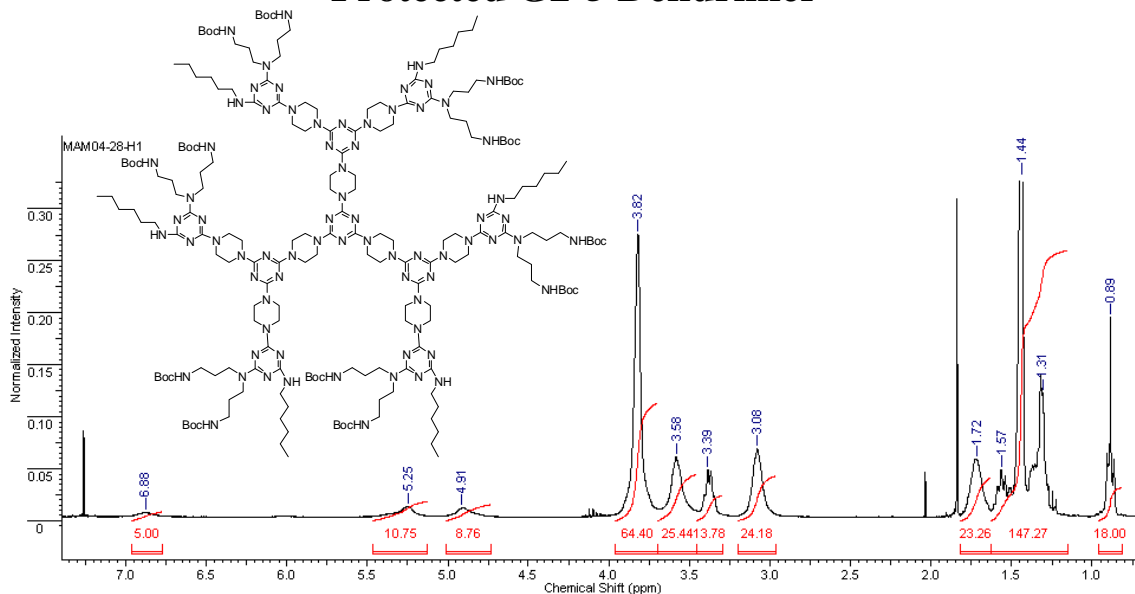

## <sup>13</sup>C NMR Spectrum Protected G2-5 Dendrimer

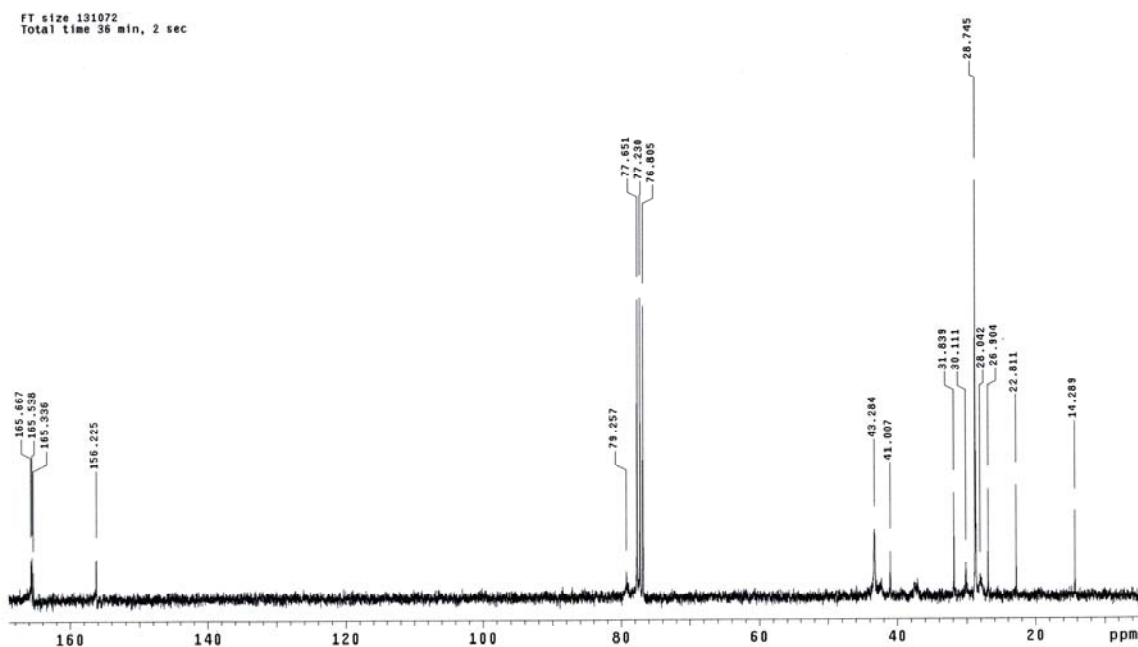

## Mass Spectrum Protected G2-5 Dendrimer

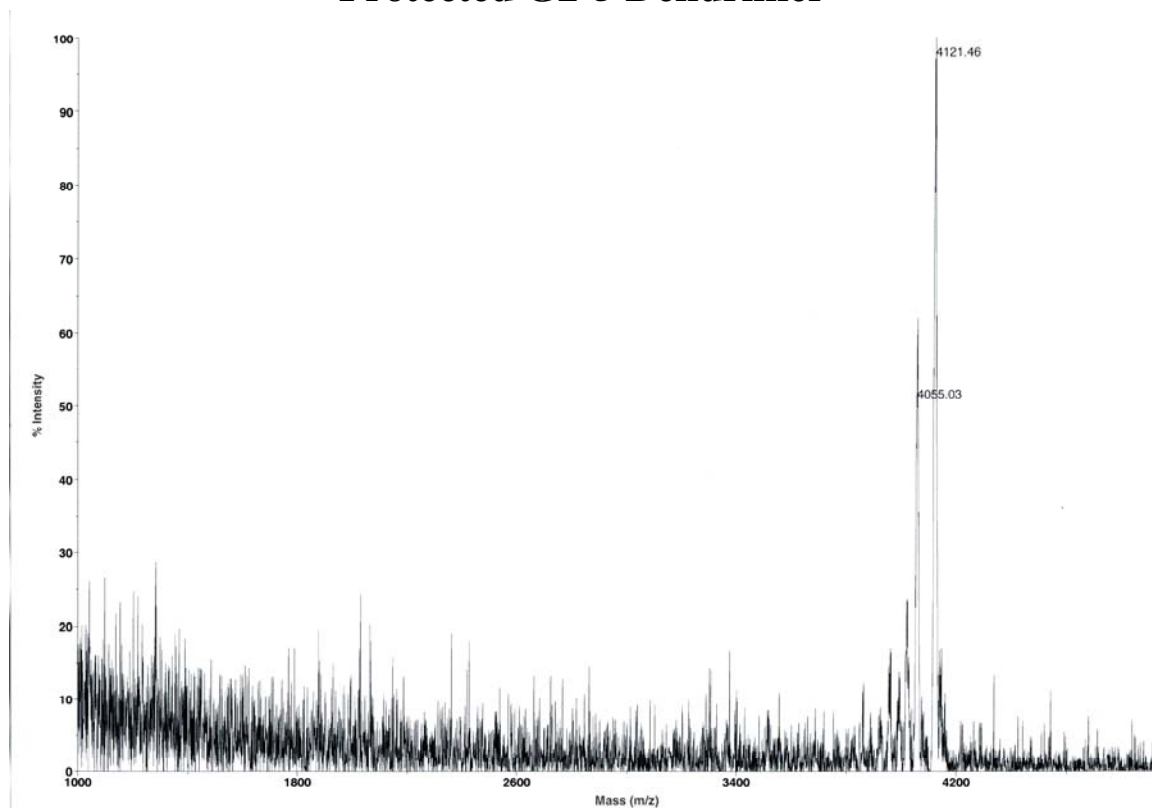

| COMPOUND                                                                            | EXACT MASS |
|-------------------------------------------------------------------------------------|------------|
| 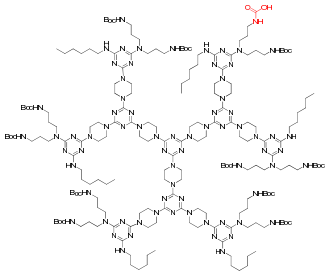 | 4062.76    |

## Mass Spectrum G2-5 Dendrimer

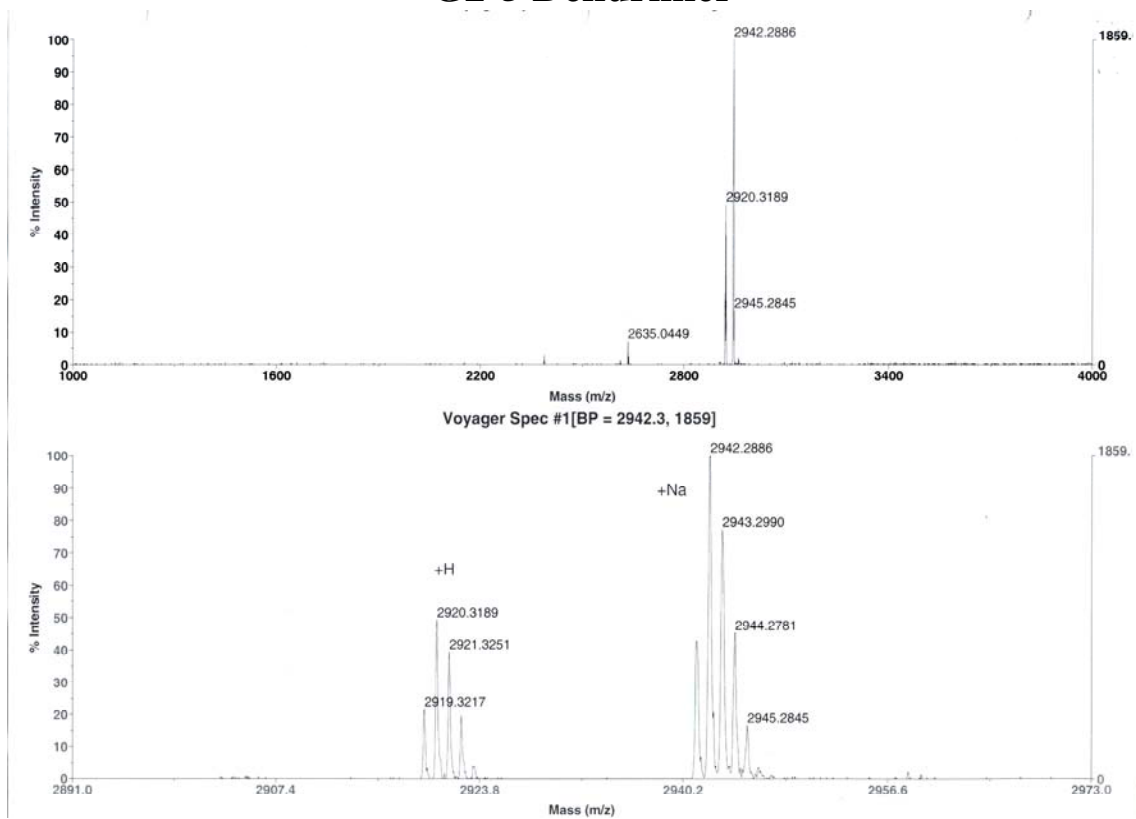

| COMPOUND                                                                            | EXACT MASS |
|-------------------------------------------------------------------------------------|------------|
| 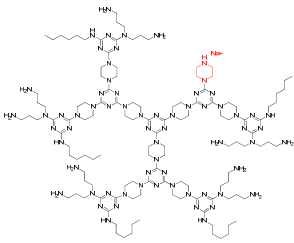 | 2633.93    |
